# Supplementary material
Source: PubMed Central journal article supplement (PMC5580835)

**A**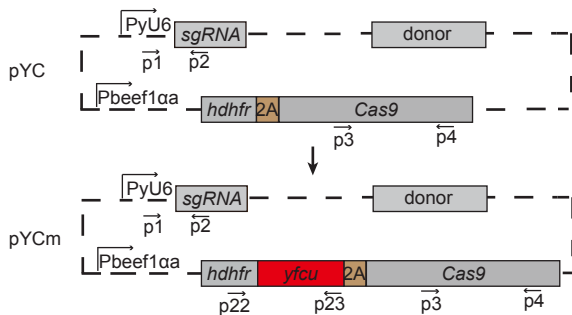**B**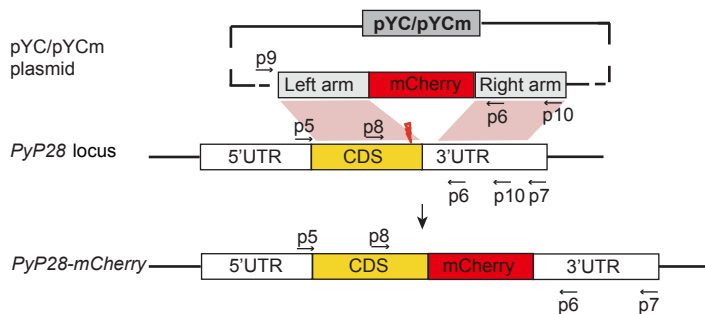**C**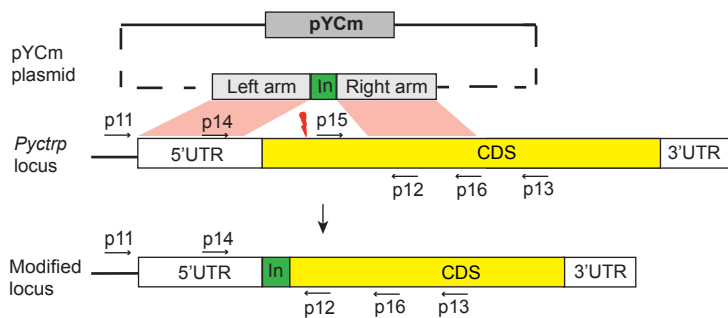**D**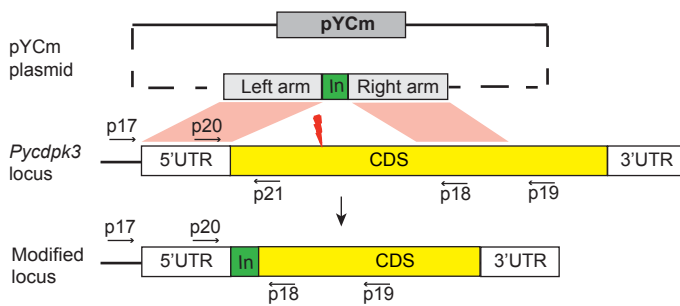

Supplement: NIHMS898774-supplement-Figure_S1.pdf [file NIHMS898774-supplement-Figure_S1.pdf]

**A**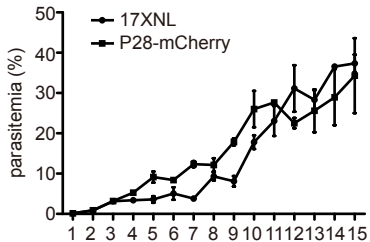**B**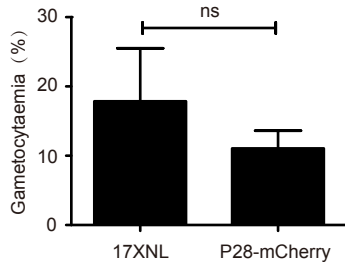**C**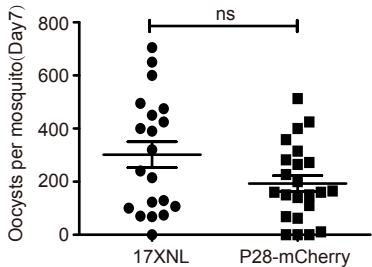**D**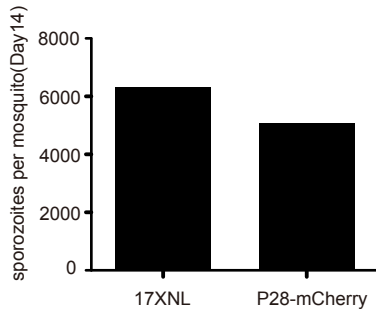

Supplement: NIHMS898774-supplement-Figure_S2.pdf [file NIHMS898774-supplement-Figure_S2.pdf]
